# Supplementary material for: MTH1 deficiency selectively increases non-cytotoxic oxidative DNA damage in lung cancer cells: more bad news than good?
Source: Springer Nature journal article supplement (doi:10.1186/s12885-018-4332-7), 2018-04-16

(i)

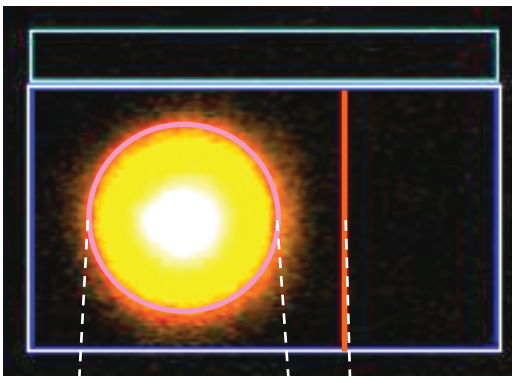

Intensity Profiles

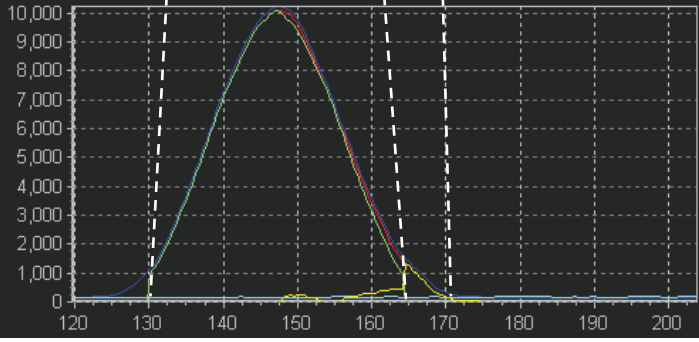

(ii)

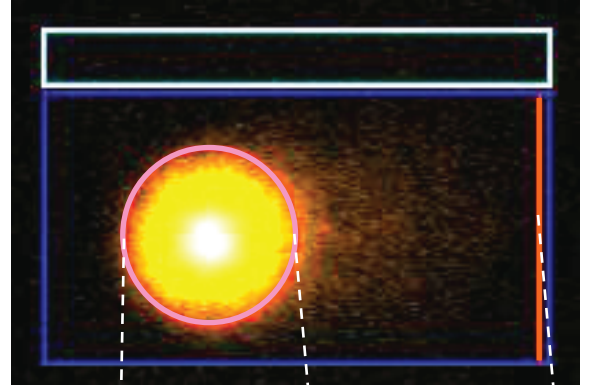

Intensity Profiles

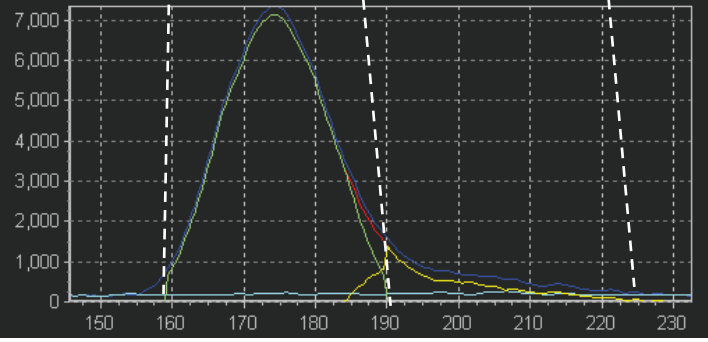

Supplement: MOESM3 [file 15703294]
