# Supplementary material for: MTH1 deficiency selectively increases non-cytotoxic oxidative DNA damage in lung cancer cells: more bad news than good?
Source: Springer Nature journal article supplement (doi:10.1186/s12885-018-4332-7), 2018-04-16

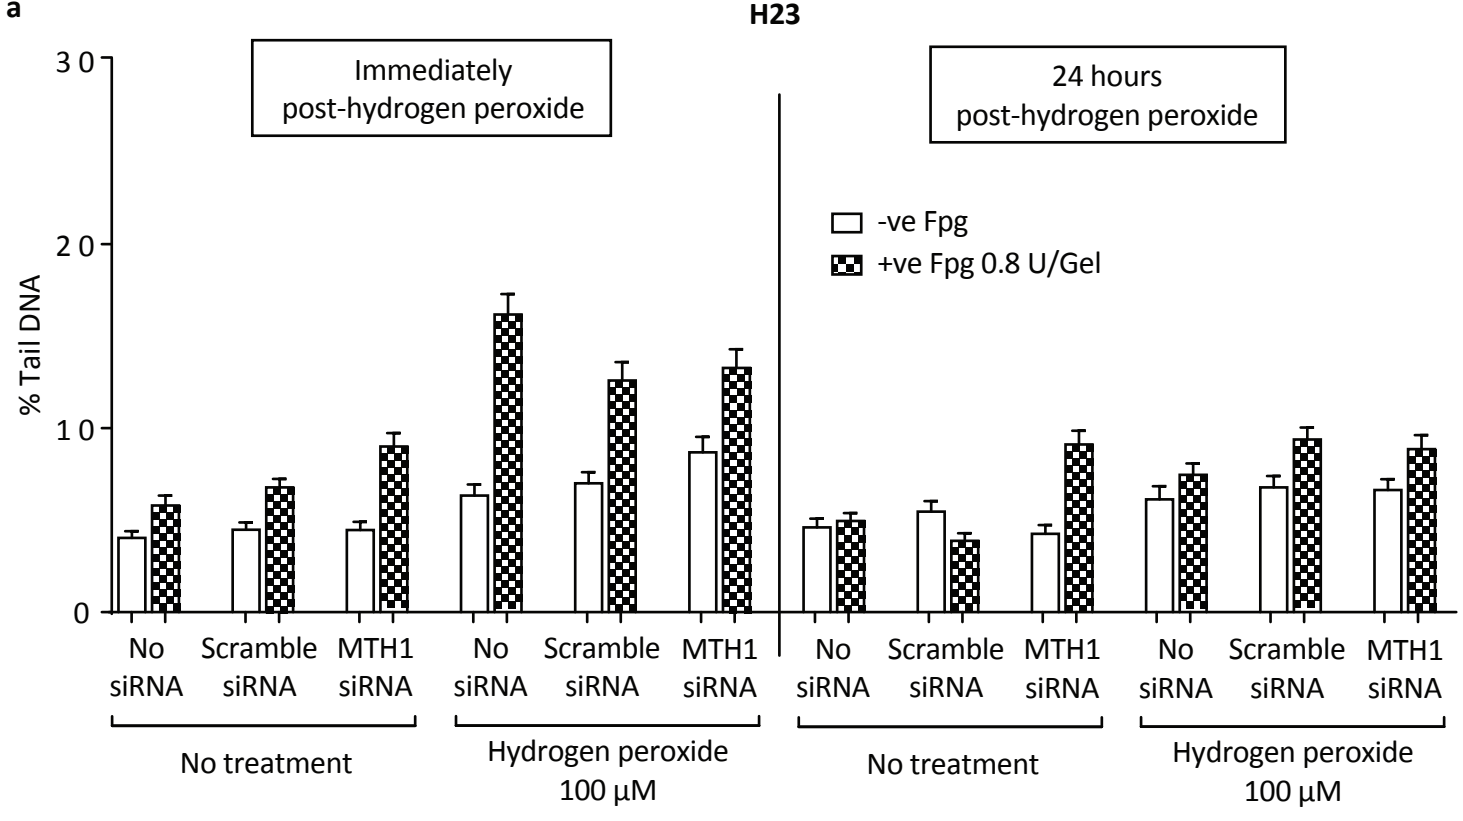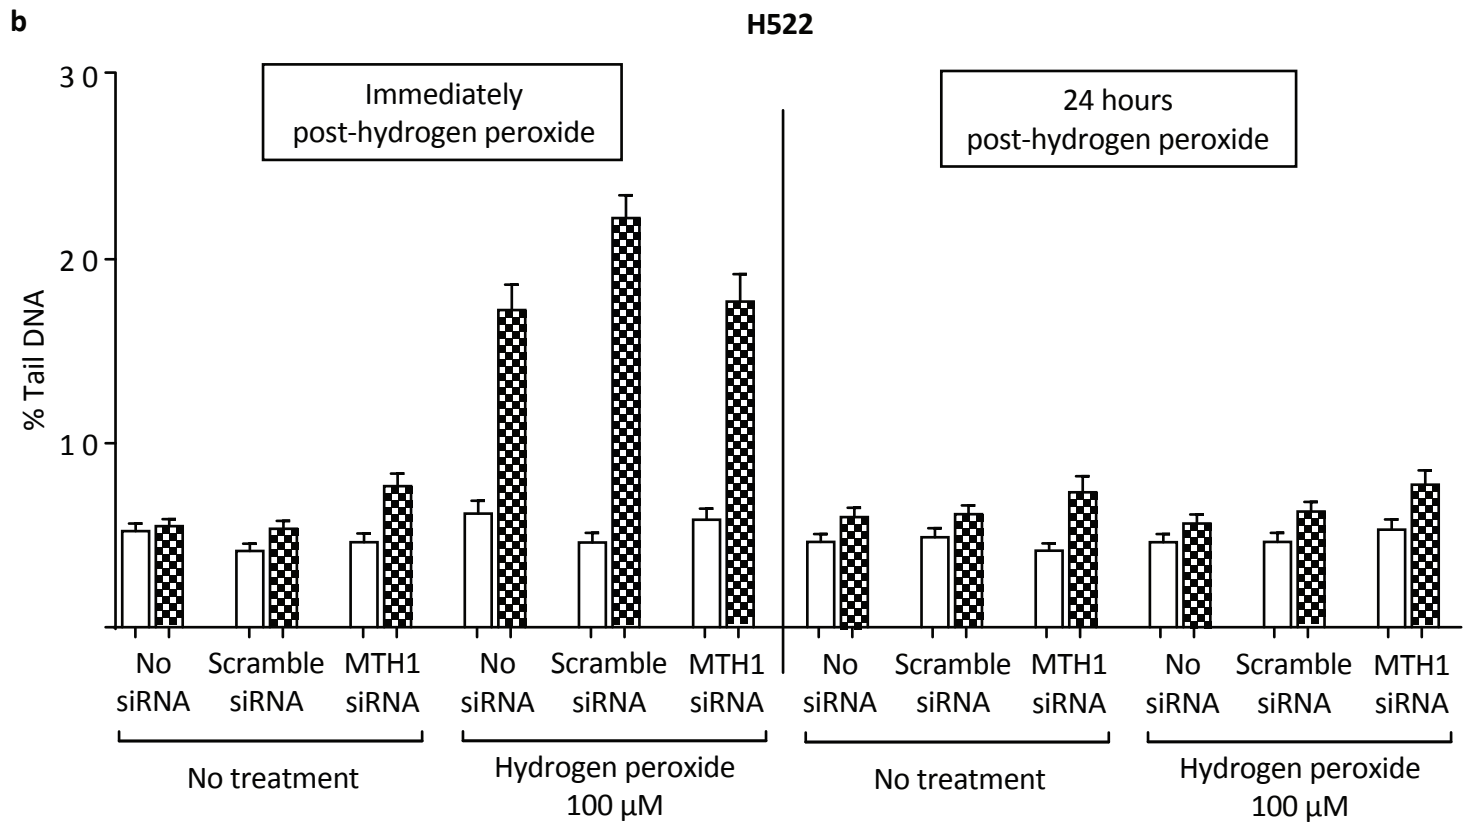

Supplement: MOESM4 [file 15703294]
